# Supplementary material for: TotBlocks: exploring the relationships between modular rock-forming minerals with 3D-printed interlocking brick modules
Source: Copernicus journal article supplement (doi:10.5194/ejm-34-523-2022), 2022-11-01
Supplement: Supplementary file 1 [file ejm-34-523-2022-supplement.zip]

Archive with 3 entries (3 files):
- FileS2_totblocks-theory-assembly-guide-2022-10-19.pdf
- ejm-34-523-2022-supplement-title-page.pdf
- FileS1_totblocks-theory-supplement-2022-09-28.pdf
