# Supplementary material for: TotBlocks: exploring the relationships between modular rock-forming minerals with 3D-printed interlocking brick modules
Source: Copernicus journal article supplement (doi:10.5194/ejm-34-523-2022), 2022-11-01
Supplement: Supplementary file 1 [file ejm-34-523-2022-supplement.zip › ejm-34-523-2022-supplement-title-page.pdf]

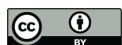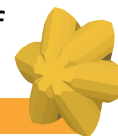

*Supplement of*

**TotBlocks: exploring the relationships between modular rock-forming minerals with 3D-printed interlocking brick modules**

**Derek D. V. Leung and Paige E. dePolo**

*Correspondence to:* Derek D. V. Leung (dleung@laurentian.ca)

- [ejm-34-523-2022-supplement-title-page.pdf](#)
- [FileS1\\_totblocks-theory-supplement-2022-09-28.pdf](#)
- [FileS2\\_totblocks-theory-assembly-guide-2022-10-19.pdf](#)

The copyright of individual parts of the supplement might differ from the article licence.
